# Supplementary material for: Mutations in LRRK2 impair NF-κB pathway in iPSC-derived neurons
Source: PubMed Central journal article supplement (PMC5116223; doi:10.1186/s12974-016-0761-x), 2016-11-18
Supplement: 12974_2016_761_MOESM3_ESM.pdf [file 12974_2016_761_MOESM3_ESM.pdf]

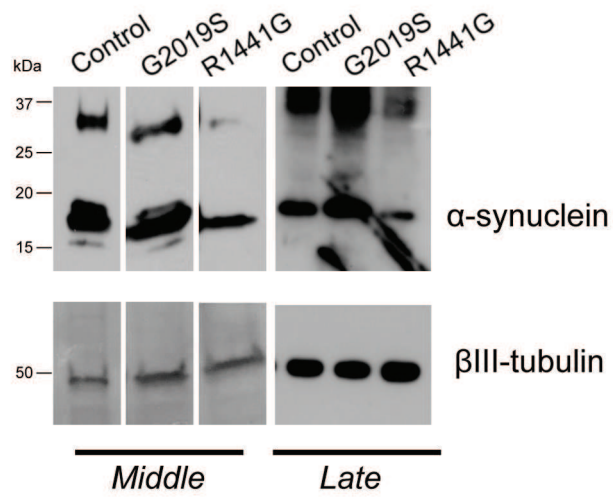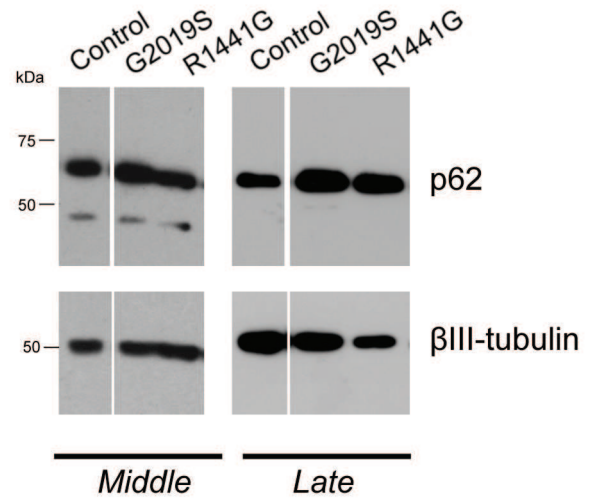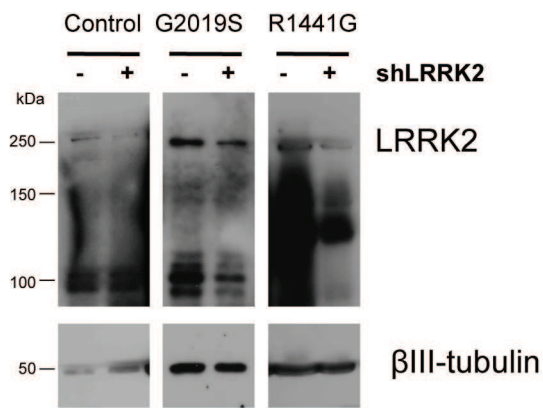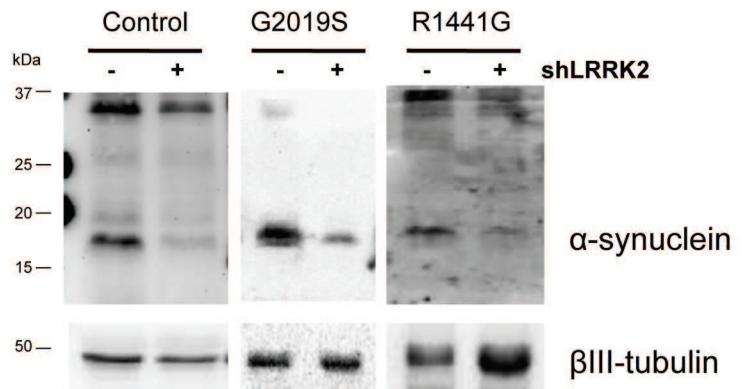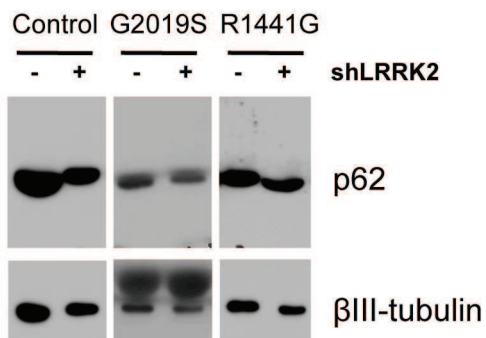

**Additional file 3.** Uncropped blots related to Figure 3.
