# Supplementary material for: Mutations in LRRK2 impair NF-κB pathway in iPSC-derived neurons
Source: Springer Nature journal article supplement (doi:10.1186/s12974-016-0761-x), 2016-11-18
Supplement: MOESM1 [file 11063068]

## Mutations in LRRK2 impair NF- $\kappa$ B pathway in iPSC-derived neurons

Rakel López de Maturana, PhD<sup>1</sup>, Valérie Lang, PhD<sup>2</sup>, Amaia Zubiarrain<sup>1</sup>, Amaya Sousa<sup>1</sup>, Nerea Vazquez<sup>1</sup>, Ana Gorostidi<sup>3</sup>, PhD, Julio Aguila<sup>1</sup>, PhD, Adolfo López de Munain<sup>4,5,6</sup>, MD, PhD, Manuel Rodríguez<sup>2</sup>, PhD, and Rosario Sánchez-Pernaute, MD, PhD<sup>1</sup>

### Additional Material.

| Target gene                     | Forward (5'-3')          | Reverse (5'-3')          |
|---------------------------------|--------------------------|--------------------------|
| PTGS1 (COX-1)                   | CGATGCATACACCACATGAA     | AGCGAAGGCTTCTCAAATCA     |
| PTGS2 (COX-2)                   | GAATCATTACACCAGGCAAATTG  | TCTGTACTGCGGGTGAACA      |
| GAPDH                           | TGCACCACCAACTGCTTAGC     | GGCATGGACTGTGGTCATGAG    |
| GFAP                            | TCTCTCGGAGTATCTGGAACTG   | TTCCCTTCCTGTCTGAGTCTCA   |
| IL6                             | ATGCAATAACCACCCCT        | AGTGCCTAACGCTCATAAC      |
| LRRK2                           | TCCAGATCAACCAAGGCTCACCAT | AGGCTGCTCGGTAAACTGATCCAA |
| MAPT                            | GATTGGGTCCCTGGACAATA     | GTGGTCTGTCTTGGCTTTGG     |
| NFKBIA (I $\kappa$ B $\alpha$ ) | GATCCGCCAGGTGAAGG        | GCAATTTCTGGCTGGTTGG      |
| PINK1                           | GCTTGGGACCTCTCTTGGAT     | CGAAGCCATCTTGAACACAA     |
| SNCA                            | TCCAGAATTCCTTCCTGTGG     | GAAGACAGTGGAGGGAGCAG     |
| TNFAIP3 (A20)                   | GTCCGGAAGCTTGTGGCGCT     | CCAAGTCTGTGTCTGAACGCCC   |
| TNFRSF1A (TNFR1)                | AATGCCGAAAGGAAATGGGTCAGG | AGGTGCACACGGTGTCTGTTTCT  |
| TNFRSF1B (TNFR2)                | TGGTGTGAAAGTCAGATGCCAGA  | TGGCAGAGTTTGGCTTTGTCGTTG |
| TH                              | TGTCTGAGGAGCCTGAGATTCG   | GCTTGTCTTGGCGTCACTG      |
| TUJ1                            | AGTCGCCCACGTAGTTGC       | CGCCAGTATGAGGGAGAT       |

**Additional Table 1.** Primer sequences used in RT-qPCR analyses.
